# Supplementary material for: Improving the electrochemical performance of Li1.2Ni0.13Co0.13Mn0.54O2 by Li-ion conductor
Source: Royal Society of Chemistry journal article supplement (doi:10.1039/c6ra12421f), 2016-01-01
Supplement: c6ra12421f1.pdf [file c6ra12421f1.pdf]

## Supporting Informations

### Improving electrochemical performance of $\text{Li}_{1.2}\text{Ni}_{0.13}\text{Co}_{0.13}\text{Mn}_{0.54}\text{O}_2$ by Li-ion conductor

Ting Wang <sup>a</sup>, Ze Yang <sup>a, \*</sup>, Yan Jiang <sup>b</sup>, Guolong Li <sup>a</sup>, Yunhui Huang <sup>a, \*</sup>

<sup>a</sup> *State Key Laboratory of Material Processing and Die & Mould Technology, School of Materials Science and Engineering, Huazhong University of Science and Technology, Wuhan, Hubei 430074, China*

<sup>b</sup> *Hubei Collaborative Innovation Center for High-efficient Utilization of Solar Energy, School of Electrical & Electronic Engineering, Hubei University of Technology, Wuhan 430068, China*

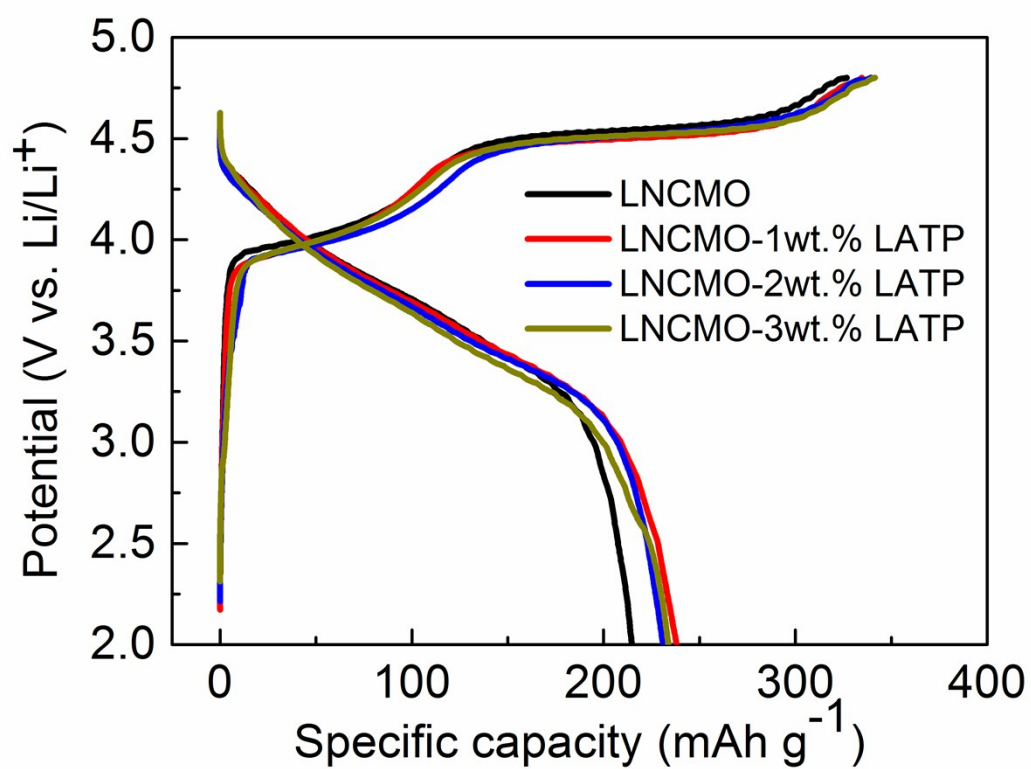

**Figure S1** Charge/discharge profiles for the first cycle for the half cells with pristine and 1, 2 and 3 wt.% LATP modified LNCMO cathodes.

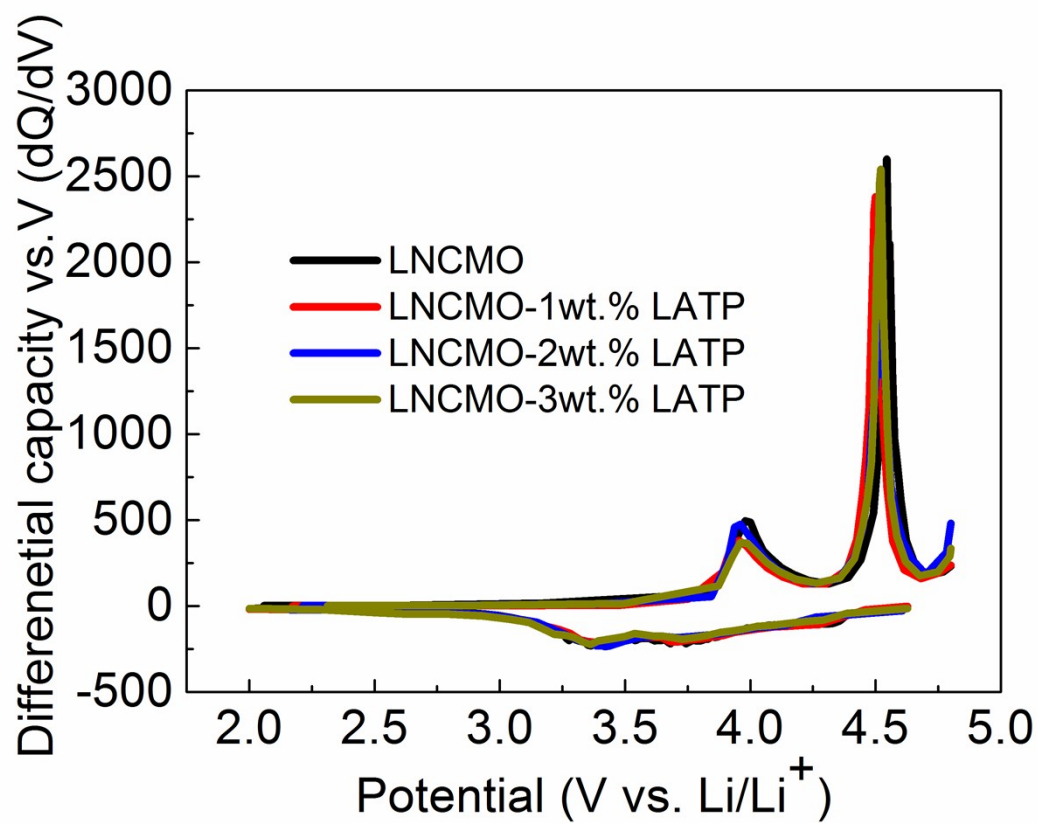

**Figure S2** Differential capacity for the half cells with pristine and 1, 2 and 3 wt.% LATP modified LNCMO cathodes.

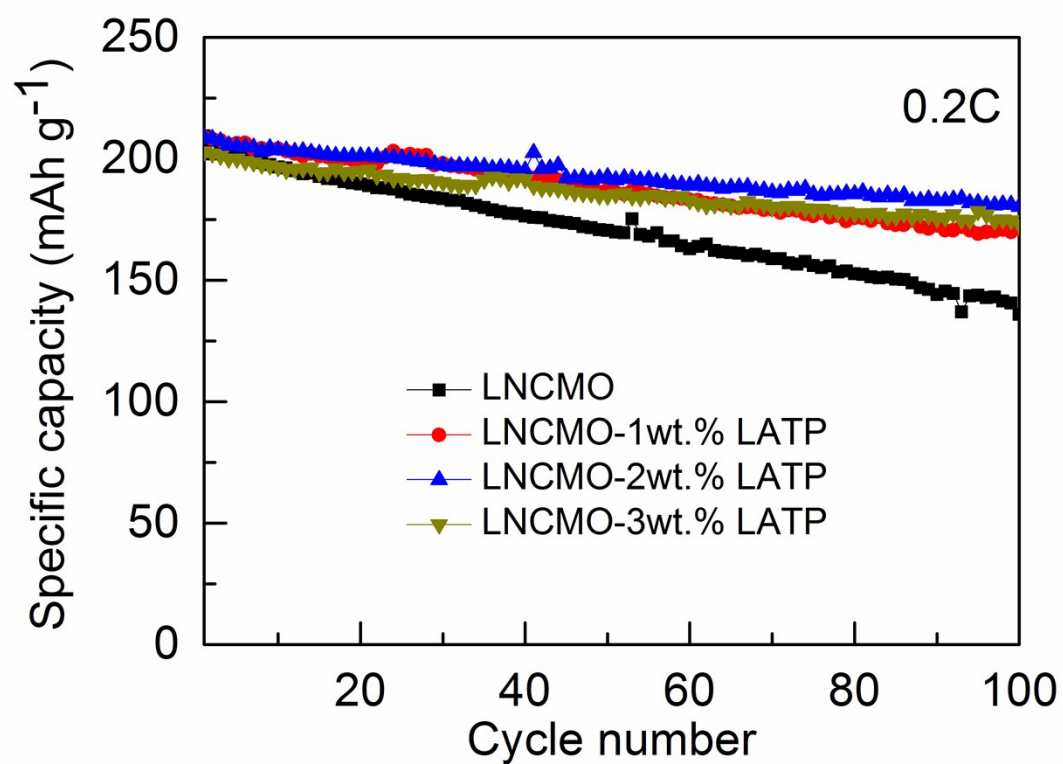

**Figure S3** Cyclic performance for the half cells with pristine and 1, 2 and 3 wt.% LATP modified LNCMO cathodes.

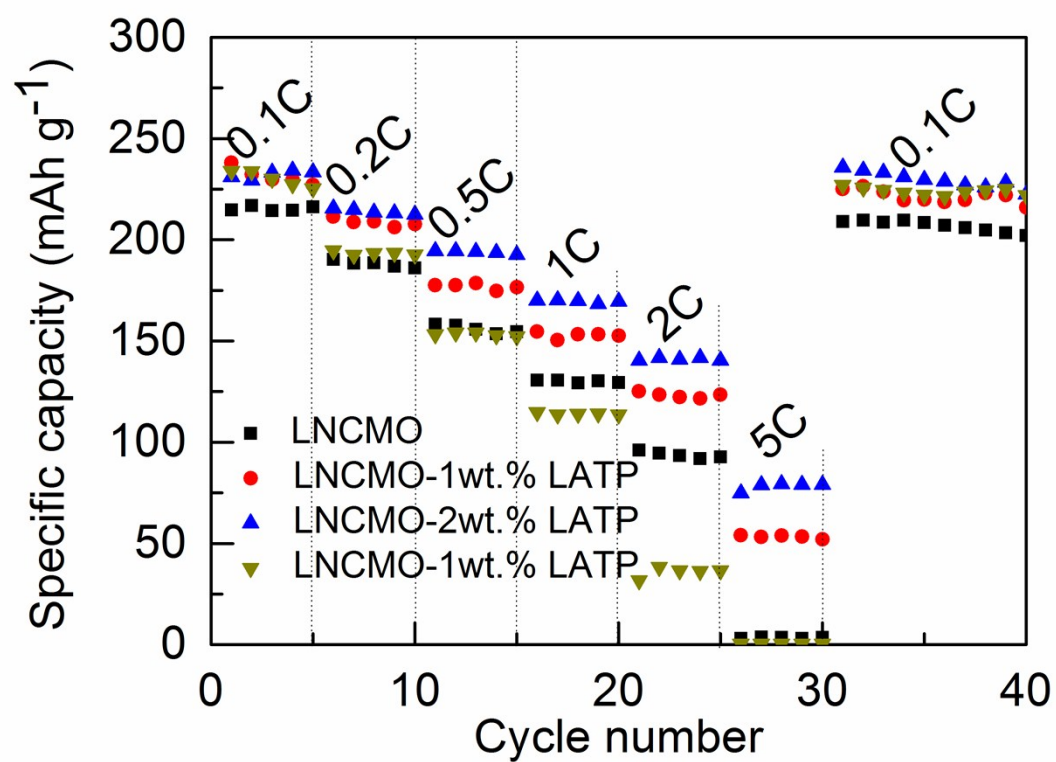

**Figure S4** Rate capability for the half cells with pristine and 1, 2 and 3 wt.% LATP modified LNCMO cathodes.
